# Supplementary material
Source: PubMed Central journal article supplement (PMC3744624)
Supplement: NIHMS461995-supplement-10.pdf [file NIHMS461995-supplement-10.pdf]

## Supplementary Tables

**Supplementary Table 1.** List of factors identified to interact with SIR-2.2. Red indicates SIR-2.2; F46G10.7a and F46G10.7b are two different splice variants of SIR-2.2; yellow marks mitochondrial biotin carboxylases; F32B6.2 is the *C. elegans* ortholog to human MCCC1.

| Protein accession number | Protein description                                                                               | Protein score | Unique peptides |
|--------------------------|---------------------------------------------------------------------------------------------------|---------------|-----------------|
| gi 71990482              | F46G10.7a [Caenorhabditis elegans], (sir-2.2)                                                     | 3822          | 159             |
| gi 71990487              | F46G10.7b [Caenorhabditis elegans], (sir-2.2)                                                     | 3759          | 159             |
| gi 17562816              | PYruvate Carboxylase family member (pyc-1) [Caenorhabditis elegans]                               | 2924          | 107             |
| gi 71985184              | E04F6.5a [Caenorhabditis elegans]                                                                 | 1660          | 49              |
| gi 604515                | Na,K-ATPase alpha subunit                                                                         | 1592          | 70              |
| gi 17551436              | ATP Synthase B homolog family member (asb-2) [Caenorhabditis elegans]                             | 870           | 30              |
| gi 450496                | lamin [Caenorhabditis elegans]                                                                    | 820           | 34              |
| gi 17553678              | Ubiquinol-Cytochrome c oxidoReductase complex family member (ucr-1) [Caenorhabditis elegans]      | 795           | 26              |
| gi 71994394              | T22D1.4 [Caenorhabditis elegans]                                                                  | 729           | 29              |
| gi 17536479              | T24H7.1 [Caenorhabditis elegans]                                                                  | 654           | 19              |
| gi 17561814              | GEX Interacting protein family member (gei-7) [Caenorhabditis elegans]                            | 605           | 24              |
| gi 17507183              | F36A2.7 [Caenorhabditis elegans]                                                                  | 562           | 27              |
| gi 32564386              | Worm AIF (apoptosis inducing factor) Homolog family member (wah-1) [Caenorhabditis elegans]       | 530           | 23              |
| gi 1255199               | sel-1 gene product                                                                                | 499           | 15              |
| gi 17551802              | B0303.3 [Caenorhabditis elegans]                                                                  | 490           | 24              |
| gi 17555006              | T12A2.2 [Caenorhabditis elegans]                                                                  | 471           | 13              |
| gi 17553980              | Tubulin, Beta family member (tbb-1) [Caenorhabditis elegans]                                      | 470           | 16              |
| gi 71992778              | Y105E8A.2 [Caenorhabditis elegans]                                                                | 460           | 19              |
| gi 1181593               | elongation factor Tu homologue precursor [Caenorhabditis elegans]                                 | 452           | 27              |
| gi 17557498              | C02E11.1a [Caenorhabditis elegans]                                                                | 450           | 24              |
| gi 71982905              | D2030.2a [Caenorhabditis elegans]                                                                 | 449           | 20              |
| gi 17557316              | B0250.5 [Caenorhabditis elegans]                                                                  | 430           | 13              |
| gi 17569737              | Ubiquinol-Cytochrome c oxidoReductase complex family member (ucr-2.2) [Caenorhabditis elegans]    | 423           | 17              |
| gi 17539560              | DIFferentiation abnormal family member (dif-1) [Caenorhabditis elegans]                           | 415           | 19              |
| gi 32564064              | B0432.4 [Caenorhabditis elegans]                                                                  | 390           | 18              |
| gi 17567343              | Propionyl Coenzyme A Carboxylase Alpha subunit family member (pcca-1) [Caenorhabditis elegans]    | 384           | 18              |
| gi 17569967              | T22H6.2a [Caenorhabditis elegans]                                                                 | 377           | 19              |
| gi 17535649              | R53.4 [Caenorhabditis elegans]                                                                    | 366           | 17              |
| gi 17557712              | ATP synthase subunit family member (atp-5) [Caenorhabditis elegans]                               | 362           | 16              |
| gi 17554158              | SERCA (Sarco-Endoplasmic Reticulum Calcium ATPase) family member (sca-1) [Caenorhabditis elegans] | 358           | 17              |
| gi 17570205              | Ubiquinol-Cytochrome c oxidoReductase complex family member (ucr-2.1) [Caenorhabditis elegans]    | 339           | 9               |
| gi 17534029              | TuBulin, Alpha family member (tba-4) [Caenorhabditis elegans]                                     | 335           | 15              |
| gi 115534052             | K02F3.2 [Caenorhabditis elegans]                                                                  | 330           | 16              |
| gi 17505833              | C34B2.7 [Caenorhabditis elegans]                                                                  | 309           | 12              |
| gi 17535181              | M05D6.6 [Caenorhabditis elegans]                                                                  | 309           | 11              |
| gi 17555336              | TuBulin, Alpha family member (tba-7) [Caenorhabditis elegans]                                     | 301           | 13              |
| gi 17507897              | G protein,O, Alpha subunit family member (goa-1) [Caenorhabditis elegans]                         | 297           | 10              |
| gi 17536841              | W10D9.5 [Caenorhabditis elegans]                                                                  | 296           | 9               |
| gi 71994521              | Y47G6A.10 [Caenorhabditis elegans]                                                                | 292           | 11              |
| gi 17535651              | R53.5 [Caenorhabditis elegans]                                                                    | 283           | 12              |
| gi 86563381              | Y45F3A.3a [Caenorhabditis elegans]                                                                | 280           | 9               |
| gi 17569483              | SPeCtrin family member (spc-1) [Caenorhabditis elegans]                                           | 279           | 16              |
| gi 71999690              | ZC410.5a [Caenorhabditis elegans]                                                                 | 277           | 10              |
| gi 17510485              | Y71F9AL.17 [Caenorhabditis elegans]                                                               | 276           | 7               |
| gi 25141345              | F23C8.5 [Caenorhabditis elegans]                                                                  | 274           | 12              |
| gi 71999412              | Y66H1B.2a [Caenorhabditis elegans]                                                                | 267           | 14              |
| gi 17535117              | gaLECTin family member (lec-3) [Caenorhabditis elegans]                                           | 262           | 13              |
| gi 17568379              | General Anaesthetic Sensitivity abnormal family member (gas-1) [Caenorhabditis elegans]           | 254           | 9               |
| gi 3549723               | calcium ATPase [Caenorhabditis elegans]                                                           | 250           | 8               |
| gi 17560308              | fatty Acid CoA Synthetase family member (acs-2) [Caenorhabditis elegans]                          | 239           | 11              |
| gi 17556298              | Y56A3A.21 [Caenorhabditis elegans]                                                                | 236           | 8               |
| gi 71999758              | ZK550.3 [Caenorhabditis elegans]                                                                  | 234           | 15              |
| gi 17540418              | Iron-Sulfur Protein family member (isp-1) [Caenorhabditis elegans]                                | 231           | 12              |
| gi 17508157              | K07G5.6 [Caenorhabditis elegans]                                                                  | 224           | 7               |
| gi 17563944              | ATP synthase subunit family member (atp-4) [Caenorhabditis elegans]                               | 220           | 9               |
| gi 71997325              | ZK370.8 [Caenorhabditis elegans]                                                                  | 219           | 8               |
| gi 72001364              | DeHydrogenases, Short chain family member (dhs-24) [Caenorhabditis elegans]                       | 218           | 9               |
| gi 17536165              | T09A5.11 [Caenorhabditis elegans]                                                                 | 217           | 7               |
| gi 25146366              | W02F12.5 [Caenorhabditis elegans]                                                                 | 216           | 7               |
| gi 71983779              | Disorganized Muscle family member (dim-1) [Caenorhabditis elegans]                                | 215           | 6               |
| gi 42538971              | TPA: TPA_exp: ANC-1 [Caenorhabditis elegans]                                                      | 204           | 10              |
| gi 115534640             | F07C3.2 [Caenorhabditis elegans]                                                                  | 203           | 7               |
| gi 17556106              | Y53G8AL.2 [Caenorhabditis elegans]                                                                | 202           | 6               |
| gi 17506651              | F15D3.7 [Caenorhabditis elegans]                                                                  | 201           | 7               |
| gi 71989417              | G protein, Subunit Alpha family member (gsa-1) [Caenorhabditis elegans]                           | 200           | 5               |

|              |                                                                                                          |     |    |
|--------------|----------------------------------------------------------------------------------------------------------|-----|----|
| gi 25144561  | NADH Ubiquinone Oxidoreductase family member (nuo-4) [Caenorhabditis elegans]                            | 198 | 6  |
| gi 482124    | hypothetical protein K11H3.3 - Caenorhabditis elegans                                                    | 198 | 10 |
| gi 17534525  | F58F12.1 [Caenorhabditis elegans]                                                                        | 196 | 6  |
| gi 17542494  | T22B11.5 [Caenorhabditis elegans]                                                                        | 193 | 8  |
| gi 17508075  | K05C4.2 [Caenorhabditis elegans]                                                                         | 192 | 7  |
| gi 17554894  | T04A8.6 [Caenorhabditis elegans]                                                                         | 189 | 6  |
| gi 71987519  | F32B6.2 [Caenorhabditis elegans] (mccc-1)                                                                | 189 | 9  |
| gi 17541830  | HisTone variant H2AZ homolog family member (htz-1) [Caenorhabditis elegans]                              | 188 | 5  |
| gi 17508505  | P-GlycoProtein related family member (pgp-2) [Caenorhabditis elegans]                                    | 187 | 3  |
| gi 17555742  | C.Elegans Y-box family member (cey-4) [Caenorhabditis elegans]                                           | 184 | 5  |
| gi 72001668  | ZK836.2 [Caenorhabditis elegans]                                                                         | 182 | 7  |
| gi 17507937  | H25P06.1 [Caenorhabditis elegans]                                                                        | 181 | 9  |
| gi 17556552  | Y76A2B.3 [Caenorhabditis elegans]                                                                        | 181 | 5  |
| gi 17533571  | F29C12.4 [Caenorhabditis elegans]                                                                        | 178 | 10 |
| gi 17531419  | C01F1.2 [Caenorhabditis elegans]                                                                         | 177 | 4  |
| gi 17551592  | F11C1.5b [Caenorhabditis elegans]                                                                        | 176 | 10 |
| gi 17567217  | F20D1.9 [Caenorhabditis elegans]                                                                         | 174 | 9  |
| gi 17534007  | F44E5.1 [Caenorhabditis elegans]                                                                         | 172 | 9  |
| gi 17569955  | T22B7.7 [Caenorhabditis elegans]                                                                         | 170 | 6  |
| gi 17531783  | steroid Alpha ReducTase family member (art-1) [Caenorhabditis elegans]                                   | 169 | 9  |
| gi 17507093  | Fatty Acid SynThase family member (fasn-1) [Caenorhabditis elegans]                                      | 168 | 5  |
| gi 17553312  | F37C12.7 [Caenorhabditis elegans]                                                                        | 168 | 4  |
| gi 17510401  | Y65B4BL.5 [Caenorhabditis elegans]                                                                       | 161 | 8  |
| gi 17194271  | MethylMalonic Aciduria type A protein family member (mmaa-1) [Caenorhabditis elegans]                    | 159 | 6  |
| gi 17553096  | DNaJ domain (prokaryotic heat shock protein) family member (dnj-10) [Caenorhabditis elegans]             | 158 | 5  |
| gi 17543984  | Y67H2A.5 [Caenorhabditis elegans]                                                                        | 157 | 8  |
| gi 7498104   | hypothetical protein D1037.4 - Caenorhabditis elegans                                                    | 154 | 10 |
| gi 17542998  | Y17G9B.5 [Caenorhabditis elegans]                                                                        | 153 | 6  |
| gi 17506225  | C54G4.8 [Caenorhabditis elegans]                                                                         | 152 | 7  |
| gi 17556745  | Y119D3B.14 [Caenorhabditis elegans]                                                                      | 152 | 4  |
| gi 71990971  | F22B8.7 [Caenorhabditis elegans]                                                                         | 151 | 5  |
| gi 25143253  | T08G11.1a [Caenorhabditis elegans]                                                                       | 150 | 6  |
| gi 17533397  | F22B5.4 [Caenorhabditis elegans]                                                                         | 148 | 6  |
| gi 17537937  | ZK669.4 [Caenorhabditis elegans]                                                                         | 147 | 7  |
| gi 17538400  | C02B10.3 [Caenorhabditis elegans]                                                                        | 147 | 5  |
| gi 7496641   | hypothetical protein C28C12.9 - Caenorhabditis elegans                                                   | 146 | 6  |
| gi 5734146   | beta-G spectrin [Caenorhabditis elegans]                                                                 | 146 | 5  |
| gi 17538097  | FZO (Fzo mitochondrial fusion protein) related family member (fzo-1) [Caenorhabditis elegans]            | 146 | 7  |
| gi 17553574  | Temporarily Assigned Gene name family member (tag-174) [Caenorhabditis elegans]                          | 146 | 7  |
| gi 17533517  | F28A10.6 [Caenorhabditis elegans]                                                                        | 142 | 6  |
| gi 17539680  | F02H6.5 [Caenorhabditis elegans]                                                                         | 142 | 4  |
| gi 17544682  | ZK829.7 [Caenorhabditis elegans]                                                                         | 135 | 5  |
| gi 17568881  | K11G12.5 [Caenorhabditis elegans]                                                                        | 135 | 9  |
| gi 71993767  | K10C2.1 [Caenorhabditis elegans]                                                                         | 133 | 4  |
| gi 17508985  | T09B4.9 [Caenorhabditis elegans]                                                                         | 132 | 8  |
| gi 17533543  | F28C6.8 [Caenorhabditis elegans]                                                                         | 132 | 3  |
| gi 17562026  | Heat Shock Protein family member (hsp-16.1) [Caenorhabditis elegans]                                     | 131 | 4  |
| gi 17557107  | Temporarily Assigned Gene name family member (tag-252) [Caenorhabditis elegans]                          | 129 | 4  |
| gi 17556042  | GLutaRedoXin family member (glrx-5) [Caenorhabditis elegans]                                             | 128 | 3  |
| gi 17563928  | T05H4.5 [Caenorhabditis elegans]                                                                         | 126 | 4  |
| gi 133901662 | NSF (N-ethylmaleimide sensitive secretion factor) homolog family member (nsf-1) [Caenorhabditis elegans] | 125 | 3  |
| gi 7500037   | chromosome segregation protein smc1 F28B3.7 [similarity] - Caenorhabditis elegans                        | 125 | 6  |
| gi 17561272  | F53C11.3 [Caenorhabditis elegans]                                                                        | 123 | 5  |
| gi 71997968  | Y54G2A.2a [Caenorhabditis elegans]                                                                       | 123 | 4  |
| gi 17553276  | ATP Synthase B homolog family member (asb-1) [Caenorhabditis elegans]                                    | 122 | 8  |
| gi 32564577  | T07D3.9a [Caenorhabditis elegans]                                                                        | 120 | 4  |
| gi 32563621  | NADH Ubiquinone Oxidoreductase family member (nuo-2) [Caenorhabditis elegans]                            | 119 | 6  |
| gi 17556096  | Alkyl-Dihydroxyacetonephosphate Synthase family member (ads-1) [Caenorhabditis elegans]                  | 118 | 4  |
| gi 17555666  | Cytochrome C Oxidase family member (cco-2) [Caenorhabditis elegans]                                      | 118 | 5  |
| gi 17552648  | C48B4.1 [Caenorhabditis elegans]                                                                         | 118 | 5  |
| gi 17509233  | T23H2.5 [Caenorhabditis elegans]                                                                         | 117 | 4  |
| gi 17562364  | K08D9.4 [Caenorhabditis elegans]                                                                         | 117 | 4  |
| gi 25143064  | B0205.6 [Caenorhabditis elegans]                                                                         | 116 | 6  |
| gi 17542706  | Vacuolar H ATPase family member (vha-5) [Caenorhabditis elegans]                                         | 115 | 6  |
| gi 17556130  | RAL (Ras-related GTPase) homolog family member (ral-1) [Caenorhabditis elegans]                          | 114 | 4  |
| gi 17562892  | R04F11.2 [Caenorhabditis elegans]                                                                        | 112 | 3  |
| gi 17550468  | PeRoXisome assembly factor family member (prx-3) [Caenorhabditis elegans]                                | 112 | 3  |
| gi 17560918  | F43H9.4 [Caenorhabditis elegans]                                                                         | 112 | 3  |
| gi 17552202  | C16A3.5 [Caenorhabditis elegans]                                                                         | 111 | 3  |
| gi 71998231  | Carnitine Palmitoyl Transferase family member (cpt-1) [Caenorhabditis elegans]                           | 109 | 4  |
| gi 17509681  | W10C8.5 [Caenorhabditis elegans]                                                                         | 109 | 4  |
| gi 17550124  | C04C11.2 [Caenorhabditis elegans]                                                                        | 108 | 4  |
| gi 71999501  | Y69A2AR.5 [Caenorhabditis elegans]                                                                       | 108 | 3  |
| gi 17561402  | F54F3.4 [Caenorhabditis elegans]                                                                         | 107 | 3  |
| gi 17536829  | W09H1.5 [Caenorhabditis elegans]                                                                         | 106 | 5  |
| gi 17541894  | R11A8.5 [Caenorhabditis elegans]                                                                         | 106 | 4  |
| gi 17509253  | T25G3.4 [Caenorhabditis elegans]                                                                         | 105 | 6  |
| gi 17538940  | C33A12.1 [Caenorhabditis elegans]                                                                        | 105 | 5  |
| gi 7495955   | hypothetical protein C14A4.2 - Caenorhabditis elegans                                                    | 104 | 5  |
| gi 17510361  | DNaJ domain (prokaryotic heat shock protein) family member (dnj-29) [Caenorhabditis elegans]             | 104 | 6  |
| gi 115534188 | T07E3.3 [Caenorhabditis elegans]                                                                         | 102 | 3  |

|             |                                                                                                     |     |   |
|-------------|-----------------------------------------------------------------------------------------------------|-----|---|
| gi 17560096 | F23H12.2 [Caenorhabditis elegans]                                                                   | 100 | 5 |
| gi 6686276  | Histone H3                                                                                          | 100 | 7 |
| gi 71983876 | C41C4.10 [Caenorhabditis elegans]                                                                   | 100 | 6 |
| gi 71998175 | Y55F3AR.2 [Caenorhabditis elegans]                                                                  | 99  | 3 |
| gi 17535241 | M176.3 [Caenorhabditis elegans]                                                                     | 98  | 3 |
| gi 17540238 | F37C4.6 [Caenorhabditis elegans]                                                                    | 98  | 5 |
| gi 17506935 | Temporarily Assigned Gene name family member (tag-173) [Caenorhabditis elegans]                     | 98  | 4 |
| gi 71990294 | F54B3.3 [Caenorhabditis elegans]                                                                    | 98  | 4 |
| gi 17537053 | Y38F1A.6 [Caenorhabditis elegans]                                                                   | 97  | 3 |
| gi 7209577  | kinesin like protein [Caenorhabditis elegans]                                                       | 95  | 3 |
| gi 71997402 | T25G12.7 [Caenorhabditis elegans]                                                                   | 95  | 3 |
| gi 17556801 | Temporarily Assigned Gene name family member (tag-354) [Caenorhabditis elegans]                     | 95  | 3 |
| gi 17555956 | RAB family member (rab-35) [Caenorhabditis elegans]                                                 | 93  | 4 |
| gi 17542570 | T26C12.1 [Caenorhabditis elegans]                                                                   | 91  | 5 |
| gi 71999402 | Y66H1A.2 [Caenorhabditis elegans]                                                                   | 91  | 3 |
| gi 17536635 | Vacuolar H ATPase family member (vha-6) [Caenorhabditis elegans]                                    | 91  | 3 |
| gi 17536047 | T05H10.6a [Caenorhabditis elegans]                                                                  | 90  | 5 |
| gi 17556907 | UBX-containing protein in Nematode family member (ubxn-4) [Caenorhabditis elegans]                  | 90  | 3 |
| gi 71982617 | Serine Palmitoyl Transferase family member (sptl-1) [Caenorhabditis elegans]                        | 89  | 3 |
| gi 72000917 | TITIN family member (ttn-1) [Caenorhabditis elegans]                                                | 89  | 3 |
| gi 17564522 | LiPid Depleted family member (lpd-9) [Caenorhabditis elegans]                                       | 89  | 4 |
| gi 32565091 | EATing: abnormal pharyngeal pumping family member (eat-3) [Caenorhabditis elegans]                  | 88  | 3 |
| gi 17554998 | T10F2.2 [Caenorhabditis elegans]                                                                    | 88  | 5 |
| gi 32565766 | LLC1.3 [Caenorhabditis elegans]                                                                     | 86  | 4 |
| gi 7507437  | hypothetical protein T08B2.10 - Caenorhabditis elegans                                              | 86  | 4 |
| gi 17562104 | K03B4.1 [Caenorhabditis elegans]                                                                    | 84  | 3 |
| gi 17553976 | associated with RAN (nuclear import/export) function family member (ran-1) [Caenorhabditis elegans] | 84  | 3 |
| gi 17563798 | CathePsin L family member (cpl-1) [Caenorhabditis elegans]                                          | 80  | 4 |

## Supplementary Table 2. List of factors identified to interact with SIR-2.3.

Red indicates SIR-2.3; yellow marks mitochondrial biotin carboxylases.

| Protein accession number | Protein description                                                                                                            | Protein score | Unique peptides |
|--------------------------|--------------------------------------------------------------------------------------------------------------------------------|---------------|-----------------|
| gi 17509401              | UNCoordinated family member (unc-54) [Caenorhabditis elegans]                                                                  | 5204          | 86              |
| gi 17562816              | Pyruvate Carboxylase family member (pyc-1) [Caenorhabditis elegans]                                                            | 1468          | 50              |
| gi 25150292              | MYOsin heavy chain structural genes family member (myo-2) [Caenorhabditis elegans]                                             | 1447          | 22              |
| gi 469483                | CCT-1                                                                                                                          | 965           | 24              |
| gi 25151802              | ASpartyl Protease family member (asp-1) [Caenorhabditis elegans]                                                               | 895           | 14              |
| gi 14278147              | Chain A, Crystal Structure Of Caenorhabditis Elegans Mg-Atp Actin Complexed With Human Gelsolin Segment 1 At 1.75 A Resolution | 872           | 21              |
| gi 17564182              | Chaperonin Containing TCP-1 family member (cct-7) [Caenorhabditis elegans]                                                     | 854           | 14              |
| gi 17567771              | yeast SIR related family member (sir-2.3) [Caenorhabditis elegans]                                                             | 831           | 19              |
| gi 17508449              | LEThal family member (let-75) [Caenorhabditis elegans]                                                                         | 817           | 27              |
| gi 71993203              | PolyA Binding protein family member (pab-1) [Caenorhabditis elegans]                                                           | 608           | 15              |
| gi 17532603              | Chaperonin Containing TCP-1 family member (cct-4) [Caenorhabditis elegans]                                                     | 390           | 19              |
| gi 17554158              | SERCA (Sarco-Endoplasmic Reticulum Calcium ATPase) family member (sca-1) [Caenorhabditis elegans]                              | 343           | 16              |
| gi 71982858              | HELicase family member (hel-1) [Caenorhabditis elegans]                                                                        | 318           | 11              |
| gi 25144678              | Chaperonin Containing TCP-1 family member (cct-6) [Caenorhabditis elegans]                                                     | 305           | 17              |
| gi 7496461               | hypothetical protein C25A11.4a - Caenorhabditis elegans                                                                        | 304           | 10              |
| gi 17510661              | Valyl tRNA Synthetase family member (vrs-2) [Caenorhabditis elegans]                                                           | 296           | 14              |
| gi 71987750              | human HnRNP A1 homolog family member (hrp-2) [Caenorhabditis elegans]                                                          | 291           | 13              |
| gi 17552356              | hypothetical protein C28H8.3 [Caenorhabditis elegans]                                                                          | 273           | 13              |
| gi 17567343              | Propionyl Coenzyme A Carboxylase Alpha subunit family member (pcca-1) [Caenorhabditis elegans]                                 | 273           | 13              |
| gi 25144293              | hypothetical protein F35G12.2 [Caenorhabditis elegans]                                                                         | 271           | 9               |
| gi 6744                  | gpd-2 gene product [Caenorhabditis elegans]                                                                                    | 263           | 9               |
| gi 212642053             | Fatty Acid SyNthase family member (fasn-1) [Caenorhabditis elegans]                                                            | 247           | 7               |
| gi 17509741              | Cytokinesis, Apoptosis, RNA-associated family member (car-1) [Caenorhabditis elegans]                                          | 237           | 11              |
| gi 21913108              | Proteasome regulatory particle, non-atpase-like protein 2, isoform a [Caenorhabditis elegans]                                  | 231           | 14              |
| gi 17509631              | Temporarily Assigned Gene name family member (tag-210) [Caenorhabditis elegans]                                                | 230           | 7               |
| gi 71987364              | proteasome Regulatory Particle, ATPase-like family member (rpt-4) [Caenorhabditis elegans]                                     | 223           | 6               |
| gi 17561814              | GEX Interacting protein family member (gei-7) [Caenorhabditis elegans]                                                         | 218           | 12              |
| gi 17536195              | hypothetical protein T10D4.3 [Caenorhabditis elegans]                                                                          | 211           | 12              |
| gi 212656549             | hypothetical protein Y48G9A.3 [Caenorhabditis elegans]                                                                         | 211           | 6               |
| gi 32566139              | MYOsin heavy chain structural genes family member (myo-3) [Caenorhabditis elegans]                                             | 211           | 7               |
| gi 17555344              | hypothetical protein T28D6.6 [Caenorhabditis elegans]                                                                          | 200           | 5               |
| gi 17554638              | Leucyl tRNA Synthetase family member (lrs-1) [Caenorhabditis elegans]                                                          | 199           | 6               |
| gi 482806                | 14-3-3 protein                                                                                                                 | 195           | 6               |
| gi 17531191              | Argonaute (plant)-Like Gene family member (alg-2) [Caenorhabditis elegans]                                                     | 189           | 8               |
| gi 25144314              | hypothetical protein F26B1.2 [Caenorhabditis elegans]                                                                          | 188           | 8               |
| gi 17555418              | UNCoordinated family member (unc-116) [Caenorhabditis elegans]                                                                 | 184           | 7               |
| gi 17505699              | hypothetical protein C25A1.4 [Caenorhabditis elegans]                                                                          | 182           | 5               |
| gi 17544682              | hypothetical protein ZK829.7 [Caenorhabditis elegans]                                                                          | 178           | 6               |

|              |                                                                                                             |     |    |
|--------------|-------------------------------------------------------------------------------------------------------------|-----|----|
| gi 71993870  | hypothetical protein Y43F4B.5 [Caenorhabditis elegans]                                                      | 177 | 8  |
| gi 17535701  | proteasome Regulatory Particle, Non-ATPase-like family member (rpn-9) [Caenorhabditis elegans]              | 171 | 7  |
| gi 193211092 | hypothetical protein T25C12.3 [Caenorhabditis elegans]                                                      | 170 | 4  |
| gi 17533087  | Tudor Staphylococcal Nuclease homolog family member (tsn-1) [Caenorhabditis elegans]                        | 168 | 9  |
| gi 17554784  | proteasome Regulatory Particle, ATPase-like family member (rpt-3) [Caenorhabditis elegans]                  | 166 | 4  |
| gi 17541896  | Isoleucyl tRNA Synthetase family member (irs-1) [Caenorhabditis elegans]                                    | 164 | 8  |
| gi 71987519  | hypothetical protein F32B6.2 [Caenorhabditis elegans]                                                       | 161 | 14 |
| gi 17542510  | RUVB (recombination protein) homolog family member (ruvb-2) [Caenorhabditis elegans]                        | 157 | 8  |
| gi 17505779  | hypothetical protein C30F12.7 [Caenorhabditis elegans]                                                      | 154 | 3  |
| gi 17507385  | Y-box family member (cey-2) [Caenorhabditis elegans]                                                        | 154 | 3  |
| gi 17554570  | ALIX (Apoptosis-linked gene 2 interacting protein X) homolog family member (alx-1) [Caenorhabditis elegans] | 154 | 7  |
| gi 17554786  | proteasome Regulatory Particle, ATPase-like family member (rpt-6) [Caenorhabditis elegans]                  | 150 | 5  |
| gi 17532177  | hypothetical protein C30G12.2 [Caenorhabditis elegans]                                                      | 149 | 3  |
| gi 17507121  | hypothetical protein F33D11.10 [Caenorhabditis elegans]                                                     | 146 | 3  |
| gi 17533517  | Acyl CoA DeHydrogenase family member (acdh-9) [Caenorhabditis elegans]                                      | 144 | 4  |
| gi 17563248  | proteasome Regulatory Particle, ATPase-like family member (rpt-1) [Caenorhabditis elegans]                  | 137 | 5  |
| gi 193204318 | PYRimidine biosynthesis family member (pyr-1) [Caenorhabditis elegans]                                      | 137 | 9  |
| gi 17542008  | proteasome Regulatory Particle, Non-ATPase-like family member (rpn-1) [Caenorhabditis elegans]              | 135 | 10 |
| gi 17564550  | hypothetical protein T22F3.3 [Caenorhabditis elegans]                                                       | 135 | 6  |
| gi 604515    | Na,K-ATPase alpha subunit                                                                                   | 131 | 4  |
| gi 115532854 | hypothetical protein F49C12.7 [Caenorhabditis elegans]                                                      | 131 | 3  |
| gi 17509919  | hypothetical protein Y39G10AR.8 [Caenorhabditis elegans]                                                    | 130 | 6  |
| gi 71998426  | Eukaryotic Initiation Factor family member (eif-3.B) [Caenorhabditis elegans]                               | 129 | 5  |
| gi 17531535  | Cell Division Cycle related family member (cdc-48.1) [Caenorhabditis elegans]                               | 123 | 5  |
| gi 17541388  | COP9/Signalosome and eIF3 complex shared subunit family member (cif-1) [Caenorhabditis elegans]             | 122 | 10 |
| gi 549848    | putative                                                                                                    | 122 | 5  |
| gi 17558992  | SKN-1 Dependent Zygotic transcript family member (sdz-8) [Caenorhabditis elegans]                           | 118 | 3  |
| gi 17508685  | proteasome Regulatory Particle, Non-ATPase-like family member (rpn-8) [Caenorhabditis elegans]              | 118 | 3  |
| gi 17506191  | Importin Beta family member (imb-3) [Caenorhabditis elegans]                                                | 117 | 4  |
| gi 71987092  | proteasome Regulatory Particle, Non-ATPase-like family member (rpn-6) [Caenorhabditis elegans]              | 116 | 6  |
| gi 17505955  | Eukaryotic Initiation Factor family member (eif-3.H) [Caenorhabditis elegans]                               | 112 | 6  |
| gi 17508425  | MAP kinase kinase or Erk Kinase family member (mek-2) [Caenorhabditis elegans]                              | 110 | 3  |
| gi 5430723   | dynamain [Caenorhabditis elegans]                                                                           | 103 | 5  |
| gi 3287963   | RecName: Full=Probable coatomer subunit beta~; AltName: Full=Beta~-coat protein; Short=Beta~-COP            | 103 | 5  |
| gi 17508687  | Ribosomal Protein, Small subunit family member (rps-6) [Caenorhabditis elegans]                             | 102 | 5  |
| gi 71985061  | aRginyl aa-tRNA synthetase family member (rrt-1) [Caenorhabditis elegans]                                   | 100 | 5  |
| gi 71989071  | Puromycin-sensitive AMinopeptidase family member (pam-1) [Caenorhabditis elegans]                           | 100 | 3  |
| gi 32565170  | hypothetical protein Y54H5A.2 [Caenorhabditis elegans]                                                      | 98  | 5  |
| gi 17554792  | Stress Induced Protein family member (sip-1) [Caenorhabditis elegans]                                       | 95  | 6  |
| gi 71982035  | UDP-GALactose 4-Epimerase family member (gale-1) [Caenorhabditis elegans]                                   | 95  | 4  |
| gi 17508701  | proteasome Regulatory Particle, ATPase-like family member (rpt-5) [Caenorhabditis elegans]                  | 92  | 5  |
| gi 17536431  | Ribosomal Protein, Large subunit family member (rpl-32) [Caenorhabditis elegans]                            | 92  | 3  |
| gi 25151863  | hypothetical protein F46H5.7 [Caenorhabditis elegans]                                                       | 90  | 3  |
| gi 17561272  | hypothetical protein F53C11.3 [Caenorhabditis elegans]                                                      | 88  | 5  |
| gi 17508049  | eIFTwoBeta (eIF2beta translation initiation factor) family member (iftb-1) [Caenorhabditis elegans]         | 87  | 3  |
| gi 17555742  | Y-box family member (cey-4) [Caenorhabditis elegans]                                                        | 86  | 5  |
| gi 1181593   | elongation factor Tu homologue precursor [Caenorhabditis elegans]                                           | 84  | 4  |
| gi 71999412  | hypothetical protein Y66H1B.2 [Caenorhabditis elegans]                                                      | 84  | 4  |
| gi 115533072 | hypothetical protein Y67H2A.2 [Caenorhabditis elegans]                                                      | 83  | 3  |
| gi 7496230   | hypothetical protein C17G10.8 - Caenorhabditis elegans                                                      | 83  | 3  |
| gi 25149807  | eXPORtin (nuclear export receptor) family member (xpo-1) [Caenorhabditis elegans]                           | 80  | 4  |
