# Supplementary material
Source: PubMed Central journal article supplement (PMC3744624)

**A**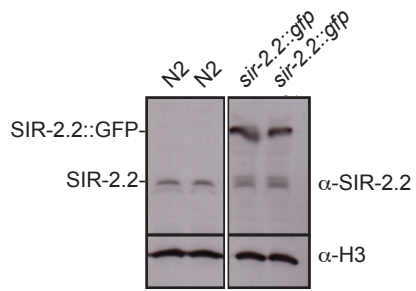**B**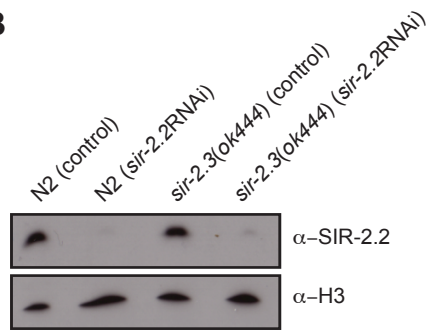**C**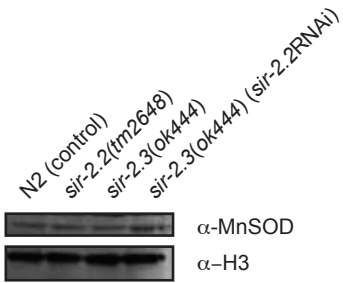

Supplement: NIHMS461995-supplement-03.pdf [file NIHMS461995-supplement-03.pdf]

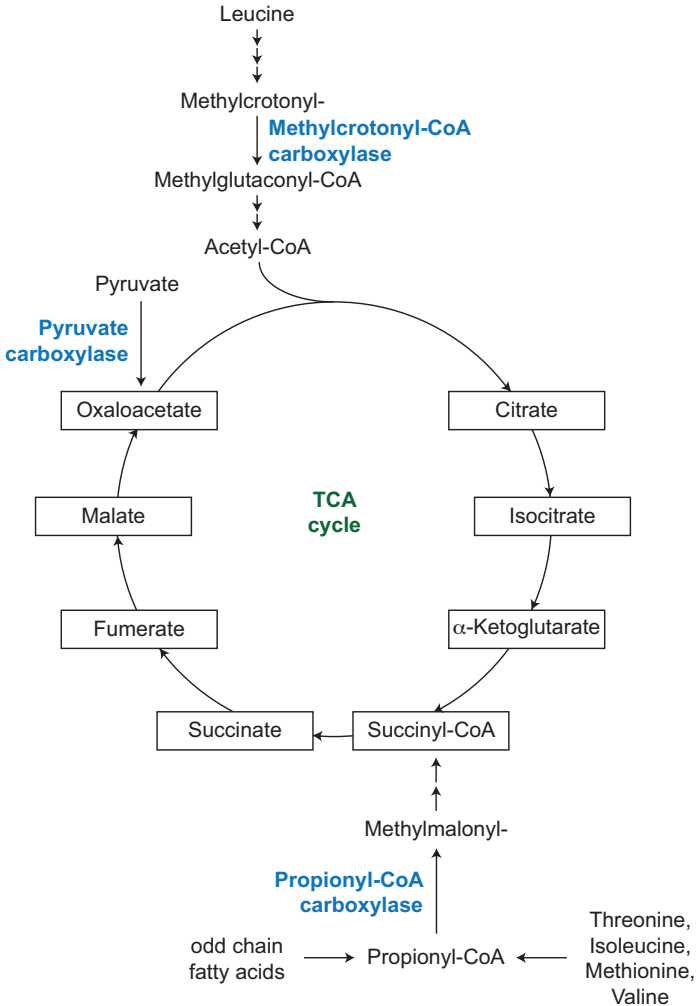

Supplement: NIHMS461995-supplement-04.pdf [file NIHMS461995-supplement-04.pdf]

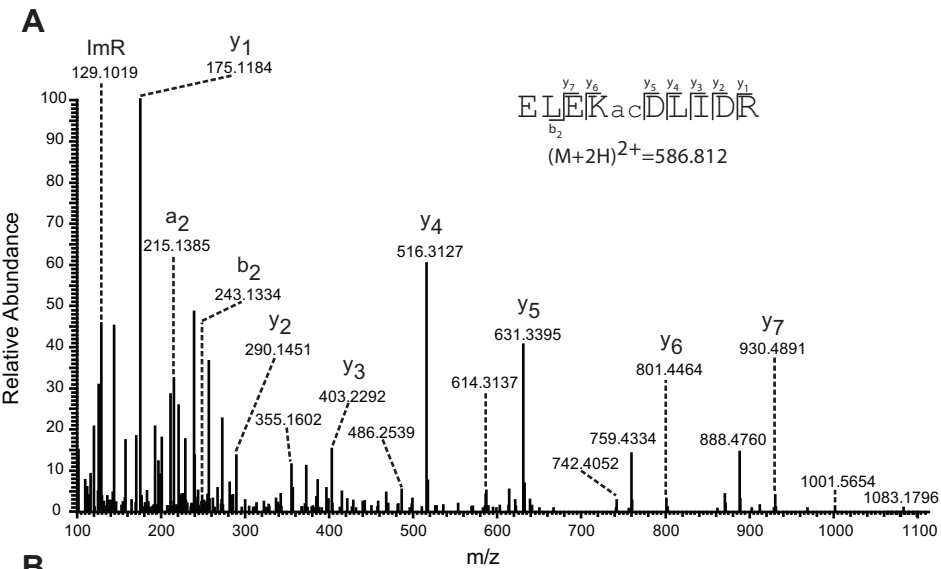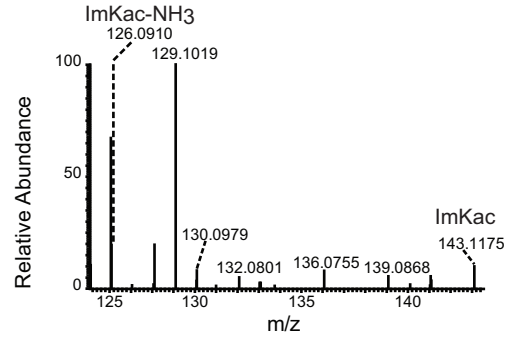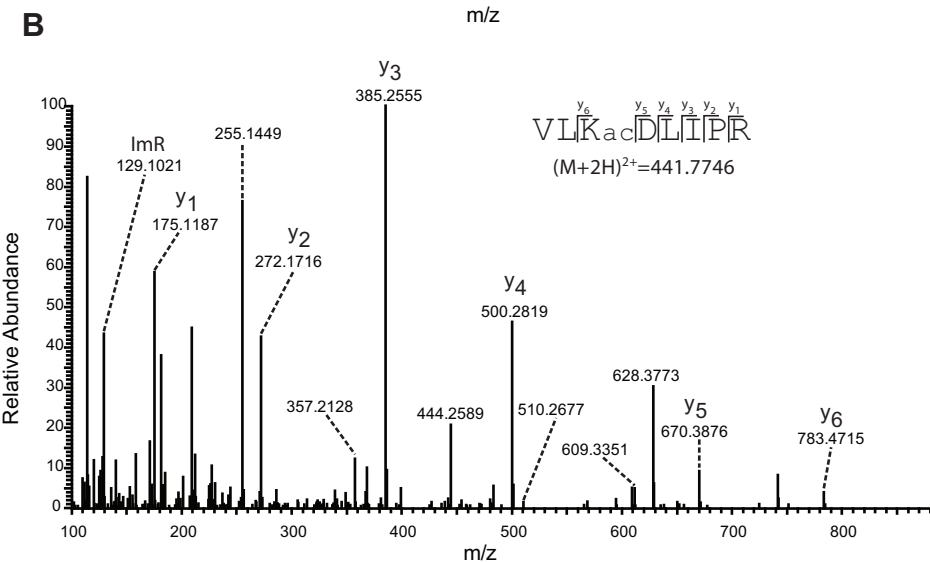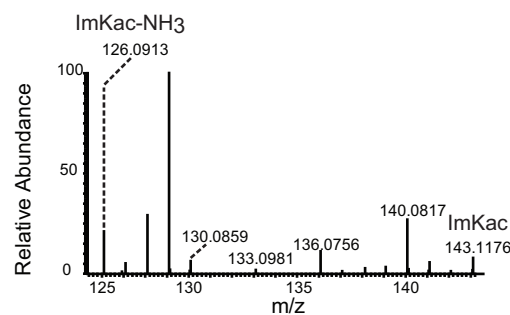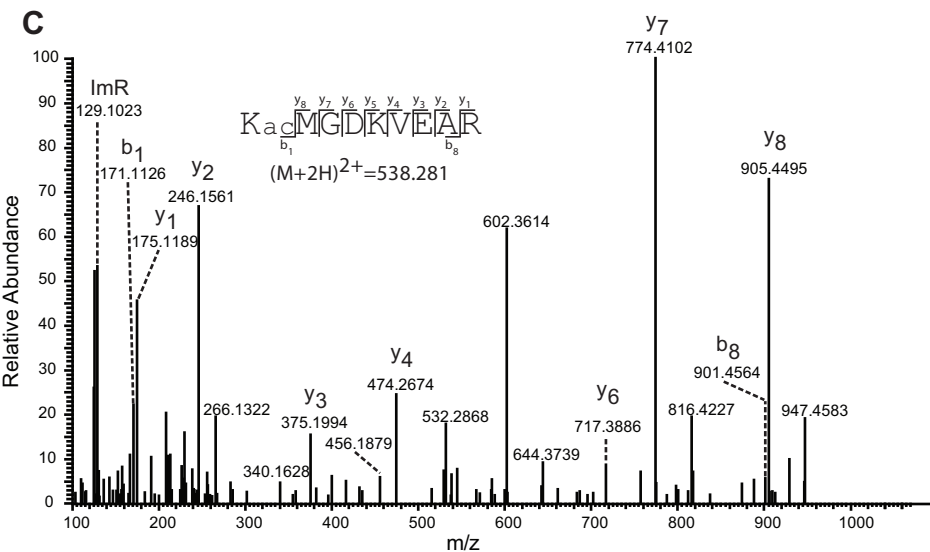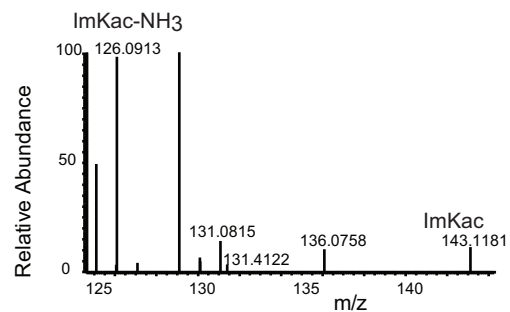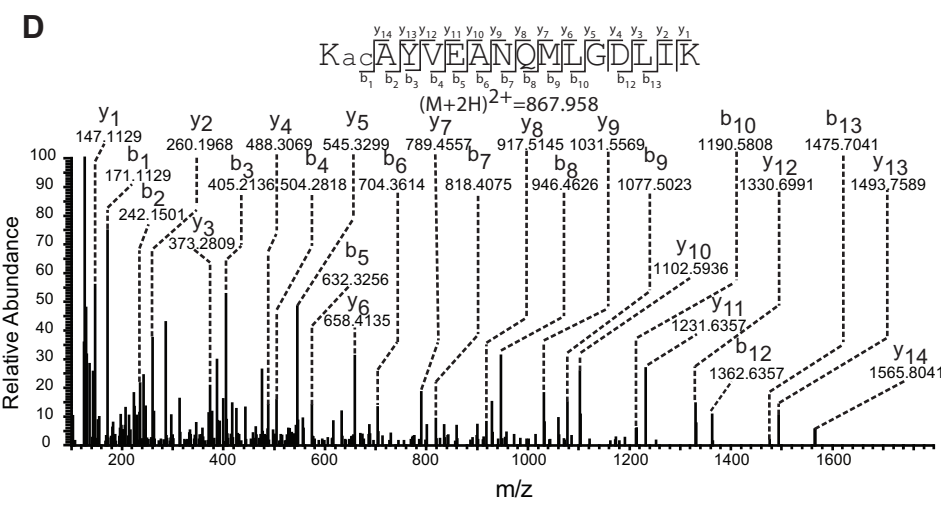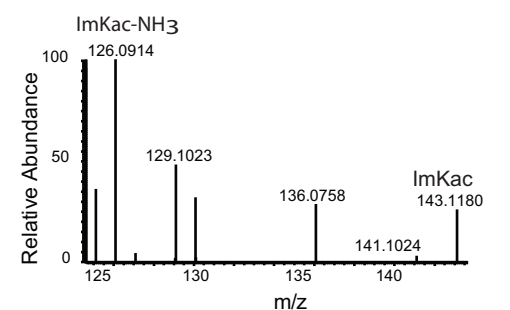

Supplement: NIHMS461995-supplement-06.pdf [file NIHMS461995-supplement-06.pdf]

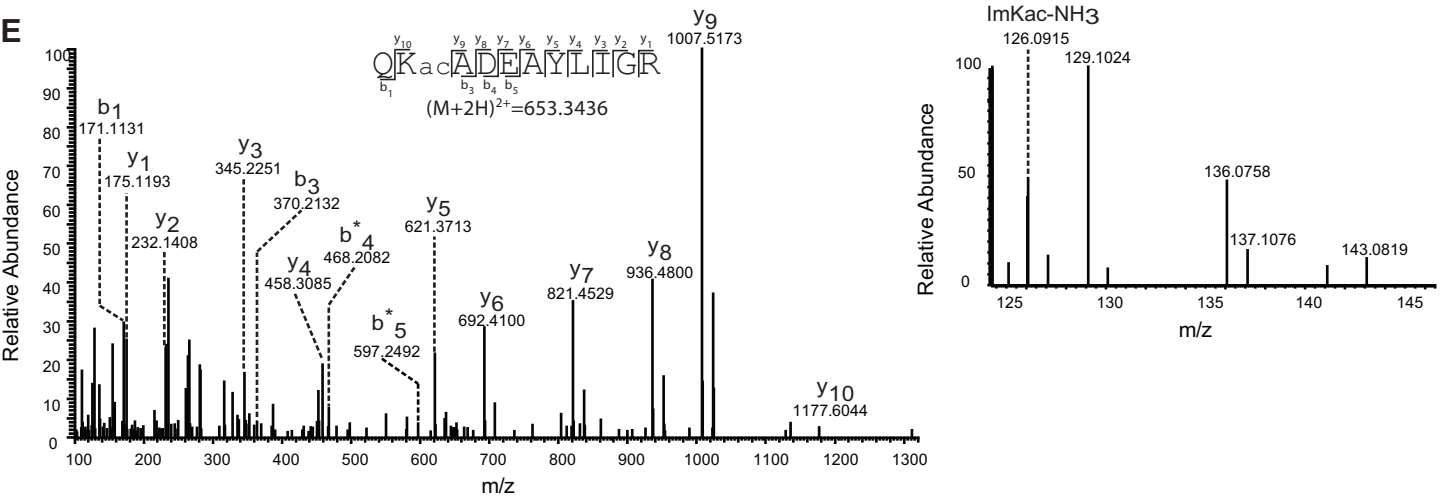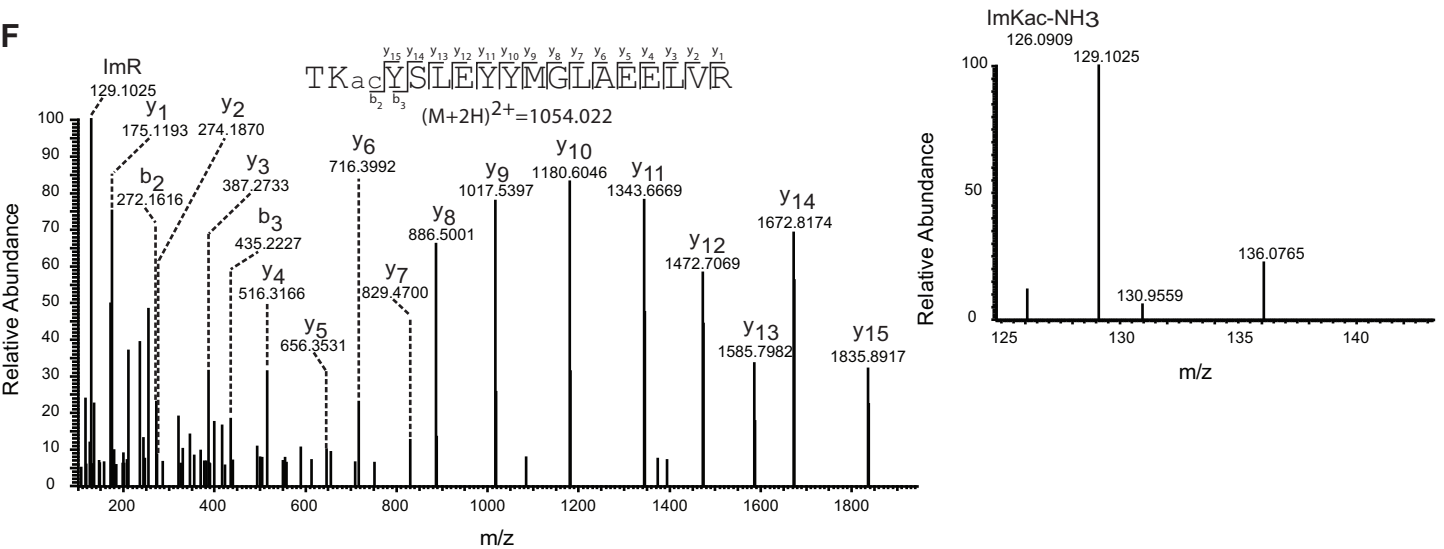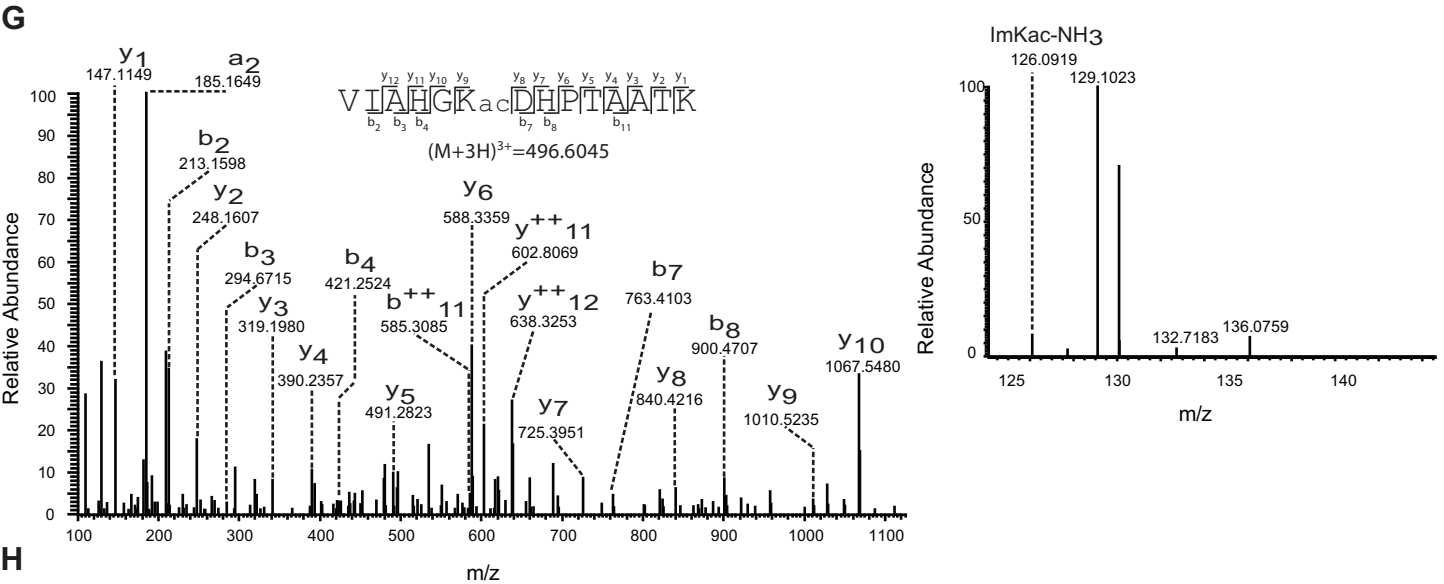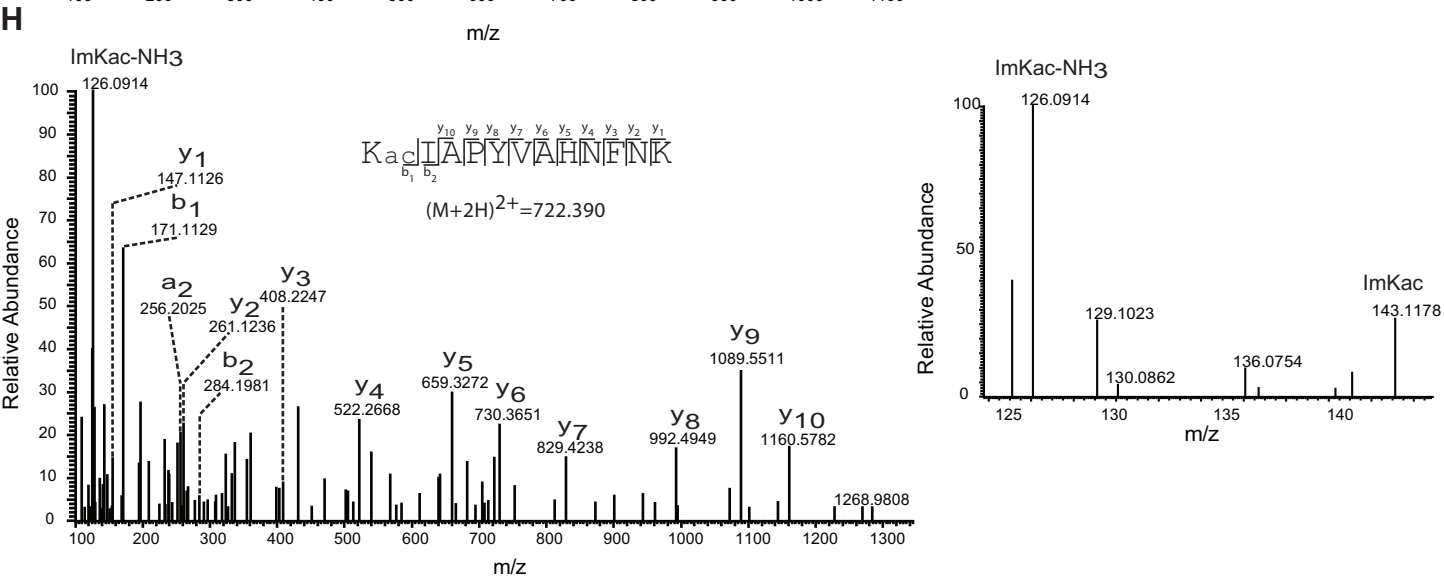

Supplement: NIHMS461995-supplement-07.pdf [file NIHMS461995-supplement-07.pdf]

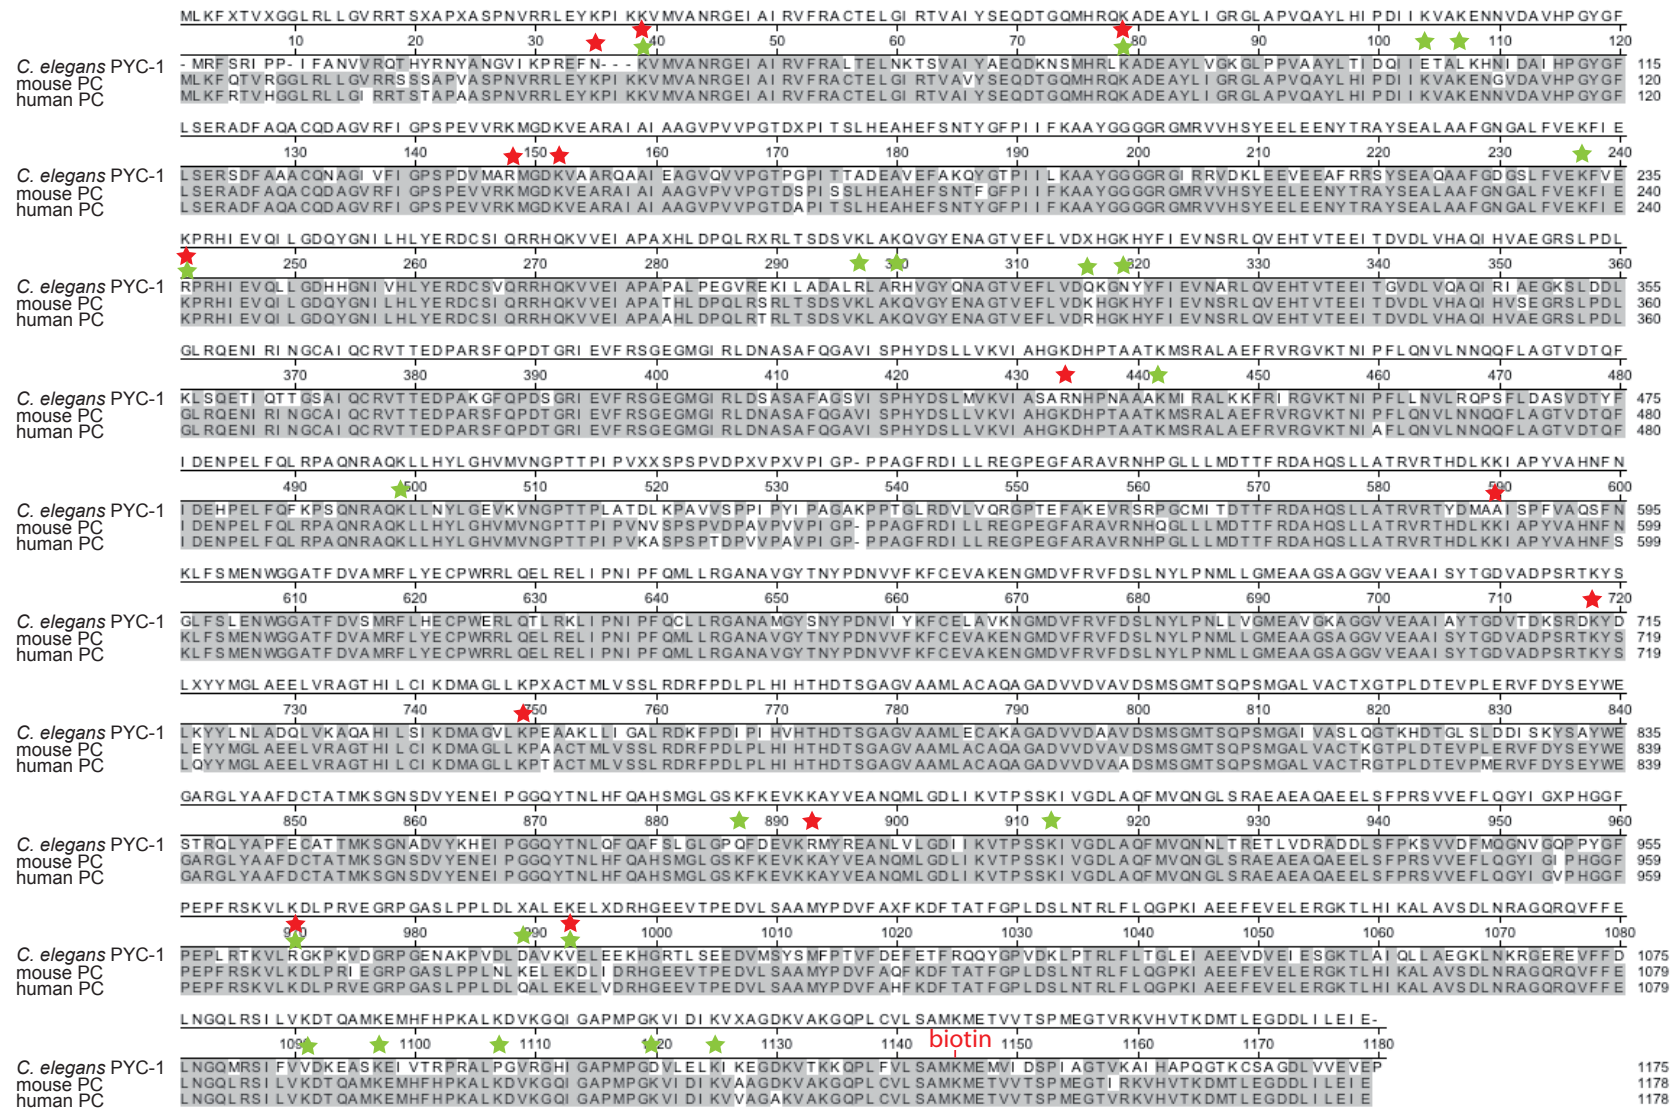

Supplement: NIHMS461995-supplement-08.pdf [file NIHMS461995-supplement-08.pdf]

**A**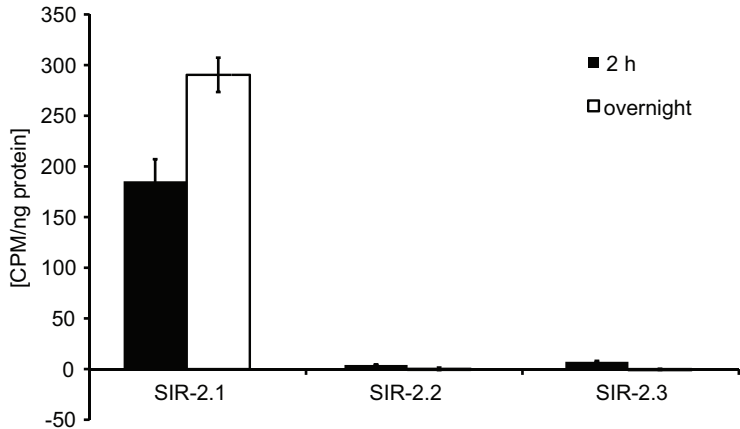**B**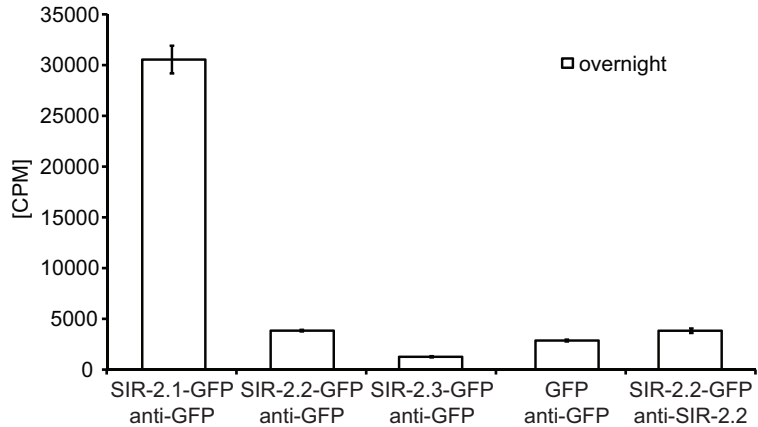

Supplement: NIHMS461995-supplement-09.pdf [file NIHMS461995-supplement-09.pdf]
